Running head: CONCEPTUAL KNOWLEDGE IN BLIND

1 **Different neural networks for conceptual retrieval in sighted and blind**

2 Roberto Bottini<sup>(1,2)\*</sup>, Stefania Ferraro<sup>(3)</sup>, Anna Nigri<sup>(3)</sup>, Valeria Cuccarini<sup>(3)</sup>, Maria  
3 Grazia Bruzzone<sup>(3)</sup>, Olivier Collignon<sup>(1,4)\*</sup>

4 <sup>1</sup> Center for Mind/Brain Studies (CIMEC), University of Trento, Trento, Italy (38123)

5 <sup>2</sup> International School for Advanced Studies (SISSA), Trieste, Italy (34136)

6 <sup>3</sup> Neuroradiology Department, Fondazione IRCCS Istituto Neurologico Carlo Besta,  
7 Milan, Italy (20133)

8 <sup>4</sup> Institute of research in Psychology (IPSY) & Institute of Neuroscience (IoNS) -  
9 University of Louvain (UCL), Louvain, Belgium (1348)

10

11 **\*Correspondence to:**

12 Roberto Bottini; University of Trento (CIMEC)

13 Via delle regole 101, 38123, Mattarello, Italy

14 Email: [bottini.r@gmail.com](mailto:bottini.r@gmail.com)

15

16 Olivier Collignon; University of Louvain (UcL)

17 10, Place du Cardinal Mercier; 1348 Louvain-La-Neuve \ Belgium

18 Email: [olivier.collignon@uclouvain.be](mailto:olivier.collignon@uclouvain.be)

19

20

**# Pages: 37**

21 **# Words: Abstract (193); Introduction (642); Discussion (1469).**

22 **Acknowledgement:** This work was supported by a European Research Council  
23 starting grant (MADVIS grant #337573) attributed to OC. OC is a research associate  
24 at the Fond National de Recherche Scientifique de Belgique (FRS-FNRS). We wish to  
25 extend our gratitude to the Michela Picchetti, Mattia Verri and Alberto Redolfi for the  
26 technical support during fMRI acquisition. We are also extremely thankful to our blind  
27 participants and the Unione Ciechi e Ipovedenti in Trento, Milano, Savona, Trieste,  
28 and the Blind Institute of Milano. We also thank Yanchao Bi and Xiaoying Wang for  
29 sharing brain maps from their previously published data.

30

31 **Author contributions:** R.B. and O.C. designed the research; R.B., S.F., A.N. and V.C.  
32 performed the research; R.B. analyzed the data in interaction with O.C.; R.B. and O.C.  
33 drafted the paper; all authors revised and edit the draft, and agreed on the final version  
34 of the manuscript.

35

## CONCEPTUAL KNOWLEDGE IN BLIND

### 1 **Abstract**

2 We investigated the experiential bases of knowledge by asking whether people that  
3 perceive the world in a different way also show a different neurobiology of concepts.  
4 We characterized the brain activity of early-blind and sighted individuals during a  
5 conceptual retrieval task in which participants rated the perceptual similarity between  
6 color and action concepts evoked by spoken words. Adaptation analysis showed that  
7 word-pairs referring to perceptually similar colors (e.g., red-orange) or actions (e.g.,  
8 run-jump) led to repetition-suppression in occipital visual regions in the sighted,  
9 regions that are known to encode visual features of objects and events, independently  
10 of their category. Early blind showed instead adaptation for similar concepts in  
11 language-related regions, but not in occipital cortices. Further analysis contrasting the  
12 two categories (color and action), independently of item similarity, activated category-  
13 sensitive regions in the pMTG (for actions) and the precuneus (for color) in both sighted  
14 and blind. These two regions, however, showed a different connectivity profile as a  
15 function of visual deprivation, increasing task-dependent connectivity with reorganized  
16 occipital regions in the early blind. Overall, our results show that visual deprivation  
17 changes the neural bases of conceptual retrieval, which is partially grounded in  
18 sensorimotor experience.

19

20 **Keywords:** Concepts; Color; Action; Blindness; Neuroplasticity; fMRI; Adaptation

21

## CONCEPTUAL KNOWLEDGE IN BLIND

1

### 2 **Significance Statement:**

3           Do people with different sensory experience conceive the world differently? We  
4 tested whether conceptual knowledge builds on sensory experience by looking at the  
5 neurobiology of concepts in early blind individuals. Participants in fMRI heard pairs of  
6 words referring to colors (e.g., green-blue) or actions (e.g., jump-run) and rated their  
7 perceptual similarity. Perceptual similarity of colors and actions was represented in  
8 occipital visual regions in the sighted, but in language-related regions in the blind.  
9 Occipital regions in the blind, albeit not encoding perceptual similarity, were however  
10 recruited during conceptual retrieval, working in concert with classic semantic hubs  
11 such as the Precuneus and the lpMTG. Overall, visual deprivation changes the neural  
12 bases of conceptual processing, which is partially grounded in sensorimotor  
13 experience.

14

15

16

## CONCEPTUAL KNOWLEDGE IN BLIND

### 1 **Introduction**

2           As we think, we navigate and retrieve conceptual knowledge, but the nature of  
3 this knowledge is highly debated. One of the major sources of disagreement is whether  
4 thinking is more similar to the analog replay of our experience (Barsalou, 1999;  
5 Kosslyn, Ganis, & Thompson, 2001), or the symbolic computations of a Turing  
6 machine (Fodor, 1975; Pylyshyn, 1984).

7           Congenital blindness offers an ideal model to test whether thinking is simulating  
8 our own experience of the world (Barsalou, 2009; Lakoff & Johnson, 1999). If  
9 conceptual processing is largely grounded into experience, blind people, who  
10 experience the world in a different way, should also show a different neurobiology of  
11 concepts, at least in part (Casasanto, 2011). Several studies, however, seem to  
12 provide evidence against this idea (Bedny & Saxe, 2012). For instance, when sighted  
13 and blind were asked to retrieve information about highly visual entities, knowledge  
14 about small and manipulable objects (Peelen et al., 2013) activated the lateral  
15 temporal-occipital complex; thinking about big non-manipulable objects activated the  
16 parahippocampal place area (He et al., 2013); and processing action verbs (compared  
17 to nouns) activated the left posterior middle temporal gyrus (Bedny et al. 2012) in both  
18 groups. These results seem to suggest that blindness leaves the neurobiology of  
19 conceptual retrieval largely unchanged, and that experience plays a minor role in  
20 shaping mental representations (Bedny & Saxe, 2012; Uta Noppeney et al., 2003).

21           Alternatively, it is possible that previous studies relied on paradigms designed  
22 to investigate categorical knowledge, a level of processing that is relatively resilient to  
23 visual deprivation (Van Baelen, and Op de Beeck 2017). Indeed, categorical  
24 boundaries (e.g., between objects, tools or animals) are drawn based on several  
25 dimensions that exceed visual appearance (e.g., tokens from the same category do  
26 not always look alike; Bracci and Op de Beeck 2016; Proklova, Kaiser, and Peelen

## CONCEPTUAL KNOWLEDGE IN BLIND

1 2016), and depend on functional, emotional and linguistic constraints (Peelen &  
2 Downing, 2017). Indeed, brain regions that show category specificity, seem to  
3 represent different categories in a format that is at least partially independent from  
4 visual appearance (Bracci & Op de Beeck, 2016), and thus more likely to be resilient  
5 to visual deprivation (Bedny et al. 2012; van den Hurk, Van Baelen, and Op de Beeck  
6 2017; Wang et al. 2015).

7 Differences between sighted and blind may be more likely to emerge when  
8 participants process the perceptual similarity of retrieved concepts (Martin, Douglas,  
9 Newsome, Man, & Barense, 2018), a process known to be encoded in more posterior  
10 (visual) occipital regions in the sighted (Fernandino et al. 2015; Borghesani et al. 2016;  
11 Mitchell et al. 2008). To test this hypothesis we asked sighted and early blind  
12 participants to rate pairs of concepts based on their perceptual similarity and analyzed  
13 the data using a repetition suppression framework (Barron, Garvert, and Behrens  
14 2016; Wheatley et al. 2005; Grill-Spector, Henson, and Martin 2006). We reasoned  
15 that this method will allow to tag selectively the representation of low-level perceptual  
16 features during conceptual retrieval (Horner & Henson, 2011; Mohr, Linder, Linden,  
17 Kaiser, & Sireteanu, 2009). We predicted that perceptually similar concepts (within a  
18 given category) might elicit neural adaptation in the occipital cortex of sighted (who will  
19 retrieve their visual similarity), but not blind people. On the other hand, a direct  
20 comparison between categories (independently of visual/perceptual similarity) should  
21 highlight category-specific responses in more anterior/multimodal areas of the brain,  
22 with limited differences between sighted and blind. This should be especially true for  
23 conceptual categories that can be perceptually experienced both by sighted and blind  
24 individuals. Therefore, in our experiment, we choose stimuli exemplars coming from  
25 actions and color categories. Including colors, that can be experienced through vision  
26 only, allowed us to test whether their different epistemological status (concrete vs

## CONCEPTUAL KNOWLEDGE IN BLIND

1 abstract), in sighted and blind, would influence their representation even in multimodal  
2 areas of the brain that usually show resilience to visual deprivation (Striem-Amit,  
3 Wang, Bi, & Caramazza, 2018).

4

### 5 **Materials and methods**

#### 6 **Participants**

7 Thirty-six participants took part to this experiment: 18 early blinds (EB; 8F) and  
8 18 sighted controls (SC; 8F). Participants were matched pairwise for gender, age, and  
9 years of education (Table S1).

10 All the blind participants lost sight at birth or before 3 years of age and all of  
11 them reported not having visual memories (Table S2). All participants were blindfolded  
12 during the task. The ethical committee of the Besta Neurological Institute approved  
13 this study (protocol fMRI\_BP\_001) and participants gave their informed consent before  
14 participation.

15

#### 16 **Stimuli**

17 We selected six Italian color words (*rosso/red*, *giallo/yellow*, *arancio/orange*,  
18 *verde/green*, *azzurro/blue*, *viola/purple*), and six Italian action words (*pugno/punch*,  
19 *graffio/scratch*, *schiaffo/slap*, *calcio/kick*, *salto/jump*, *corsa/run*). Words were all highly  
20 familiar nouns and were matched across categories (color, action), by number of letters  
21 (Color: mean= 5.83, sd= 0.98); Action: mean= 6, sd= 1.23), frequency (Zipf scale;  
22 Color: mean= 4.02, sd= 0.61; Action: mean= 4.18, sd= 0.4), and orthographic  
23 neighbors (Coltheart's N; Color: mean= 14, sd= 9.12; Action: mean= 15.33, sd= 12.42).

24 Auditory files were made using a voice synthesizer (talk to me), with a female  
25 voice, and edited into separated audio files with the same auditory properties (44100  
26 Hz, 32 bit, mono, 78 dB of intensity). The original duration of each audio file (range

## CONCEPTUAL KNOWLEDGE IN BLIND

1 356 – 464 ms) was extended or compressed to 400 ms using the PSOLA (Pitch  
2 Synchronous Overlap and Add) algorithm and the sound-editing software Praat  
3 (Boersma & Weenink, 2018). All the resulting audio files were highly intelligible.

4

### 5 **Experimental Design**

6 We designed a fast event-related fMRI paradigm during which participants  
7 listened to pairs of color and action words. In each trial the two words were played one  
8 after the other with a stimulus onset asynchrony (SOA) of 2000 ms.

9 The inter-trial interval ranged between 4000 and 16000 ms. Participants were  
10 asked to judge the similarity of the two colors or the two actions from 1 to 5 (1: very  
11 different, 5: very similar). Responses were collected via an ergonomic hand-shaped  
12 response box with five keys (Resonance Technology Inc.). All participants used their  
13 right hand to provide responses (thumb = very different, pinky = very similar).  
14 Participants were told that they had about 4 seconds to provide a response after the  
15 onset of the second word of the pair and they were encouraged to use all the scale (1  
16 to 5). Furthermore, the instruction was to judge the similarity of colors and actions  
17 based on their perceptual properties (avoiding reference to emotion, valence, or other  
18 non perceptual characteristics). Blind participants were told to judge color pairs on the  
19 basis of their knowledge about the perceptual similarity between colors.

20 Color and action words were presented in all possible within-category  
21 combinations (15 color pairs, 15 action pairs). Each pair was presented twice in each  
22 run, in the two possible orders (e.g., red-yellow, yellow-red). Thus, there were 60 trials  
23 in each run and the experiment consisted in 5 runs of 7 minutes. Stimuli were  
24 pseudorandomized using optseq2 to optimize the sequence of presentation of the  
25 different conditions. Three different optimized lists of trials were used across runs. List  
26 order was counterbalanced across subjects.

## CONCEPTUAL KNOWLEDGE IN BLIND

1           One early blind was excluded from the analyses because the subject answered  
2 to less than 70% of the trials throughout the experiment due to sleepiness. One run of  
3 one sighted subject was excluded from the analysis because of a technical error during  
4 the acquisition, and two other runs (one in a sighted subject, one in a blind subject)  
5 were excluded since the subject answered to less than 70% of the trials in that specific  
6 run.

7

### 8 **Conceptual similarity ratings**

9           In order to perform the adaptation analysis, we divided the trials in similar pairs  
10 (e.g. red - orange) and different pairs (e.g. red - blue). We did so based on the  
11 participants' subjective ratings. For each participant we took the average rating for  
12 each of the 15 word-pairs in the action and color categories. Then we automatically  
13 divided the 15 pairs in 5 intervals (4 quantiles) of nearly equal size. This subdivision  
14 was performed using the function *quantile*, in R (R Core Team, 2013), that divides a  
15 probability distribution into contiguous intervals of equal probabilities (i.e., 20%). The  
16 pairs in the first two intervals were the different pairs (low ratings of similarity), the pairs  
17 in the 3<sup>rd</sup> interval were the medium pairs, and the pairs in the 4<sup>th</sup> and 5<sup>th</sup> intervals were  
18 the similar pairs (See fig 2B). However, in some cases, ratings distributions were  
19 slightly unbalanced, due to the tendency of some subjects to find more “very different”  
20 pairs than “very similar” pairs. In these cases (8 subjects for action ratings [3 EB]; 4  
21 subjects for Color Ratings [1 EB]), the automatic split in 5 equal intervals was not  
22 possible. Thus, we set the boundary between the 2<sup>nd</sup> and 3<sup>rd</sup> interval at the ratings  
23 average (for that given subject), and set to the minimum (1 or 2, depending on the  
24 cases) the number of items in the 3<sup>rd</sup> interval (not analyzed), in order to balance as  
25 much as possible the number of pairs in the Different and Similar groups. This  
26 procedure made so that in these special cases (as well as in all the others), the rating



## CONCEPTUAL KNOWLEDGE IN BLIND

1 values of different pairs were always below the mean, and the values of similar pairs  
2 was always above the mean. Fig. S4, S5, S6, S7, in the supplementary information,  
3 show subject-specific rating distributions.

4

### 5 **MRI data acquisition**

6 Brain images were acquired at the Neurological Institute Carlo Besta in Milano  
7 on a 3-Tesla scanner with a 32-channel head coil (Achieva TX; Philips Healthcare,  
8 Best, the Netherlands) and gradient echo planar imaging (EPI) sequences.

9 In the event-related experiment, we acquired 35 slices (voxel size 3 X 3 X 3.5)  
10 with no gap. The data in-plane matrix size were 64 X 64, field of view (FOV) 220mm X  
11 220mm, time to repetition (TR)= 2 s, flip angle 90 degrees and time to echo (TE)= 30  
12 ms. In all, 1210 whole-brain images were collected during the experimental sequence.  
13 The first 4 images of each run were excluded from the analysis for steady-state  
14 magnetization. Each participant performed 5 runs, with 242 volumes per run.

15 Anatomical data was acquired using a T1-weighted 3D-TFE sequence with the  
16 following parameters: 1 X 1 X 1 mm voxel size, 240 X 256 matrix size, 2.300 ms TR,  
17 2.91 ms ET, 900 ms TI, 256 FoV, 160 slices.

18

### 19 **MRI data analysis**

20 We analyzed the fMRI data using SPM12 ([www.](http://www.fil.ion.ucl.ac.uk/spm/software/spm12/)  
21 [fil.ion.ucl.ac.uk/spm/software/spm12/](http://fil.ion.ucl.ac.uk/spm/software/spm12/)) and Matlab R2014b (The MathWorks, Inc.).

22 **Preprocessing.** Preprocessing included slice timing correction of the functional time  
23 series (Sladky et al., 2011), realignment of functional time series, coregistration of  
24 functional and anatomical data, spatial normalization to an echoplanar imaging  
25 template conforming to the Montreal Neurological Institute (MNI) space, and spatial  
26 smoothing [Gaussian kernel, 6 mm full-width at half-maximum (FWHM)]. Serial

## CONCEPTUAL KNOWLEDGE IN BLIND

1 autocorrelation, assuming a first-order autoregressive model, was estimated using the  
2 pooled active voxels with a restricted maximum likelihood procedure, and the  
3 estimates were used to whiten the data and design matrices.

4 **Data analysis.** Following preprocessing steps, the analysis of fMRI data,  
5 based on a mixed-effects model, was conducted in two serial steps accounting,  
6 respectively, for fixed and random effects. In all the analysis the regressors for the  
7 conditions of interest consisted of an event-related boxcar function convolved with the  
8 canonical hemodynamic response function according to a variable epoch model  
9 (Grinband, Wager, Lindquist, Ferrera, & Hirsch, 2008). Movement parameters derived  
10 from realignment of the functional volumes (translations in x, y, and z directions and  
11 rotations around x, y, and z axes), and a constant vector, were also included as  
12 covariates of no interest. We used a high-pass filter with a discrete cosine basis  
13 function and a cutoff period of 128 s to remove artifactual low-frequency trends.

14 **Adaptation analysis:** For each subject, the general linear model included 6  
15 regressors corresponding to the 3 levels of similarity (different, medium, similar) in  
16 each condition (color, action). Color and Action pairs in the medium condition were  
17 modeled as regressors of no interest.

18 At the first level of analysis, linear contrasts tested for Repetition Suppression  
19 [Different > Similar] collapsing across categories (Action, Color). The same contrasts  
20 were then repeated within each category [Color Different > Color Similar; Action  
21 Different > Action Similar]. Finally, we tested for the Similarity by Category interactions,  
22 testing whether the adaptation was stronger in one category compared to the other  
23 (e.g., [Color Different > Color Similar] > [Action Different > Action Similar]).

24 These linear contrasts generated statistical parametric maps [SPM(T)]. The  
25 resulting contrast images were then further spatially smoothed (Gaussian kernel 5mm  
26 FWHM) and entered in a second-level analysis (RFX), corresponding to a random-

## CONCEPTUAL KNOWLEDGE IN BLIND

1 effects model, accounting for inter-subject variance. One-sample t-tests were run on  
2 each group separately. Two-sample t-tests were then performed to compare these  
3 effects between groups (Blind vs Sighted).

4 **Univariate analysis:** For each subject, changes in regional brain responses  
5 were estimated through a general linear model including 2 regressors corresponding  
6 to the two categories Action and Color. The onset of each event was set at the  
7 beginning of the first word of the pair, the offset was determined by the subject  
8 response, thus included reaction time (Grinband et al., 2008). Linear contrasts tested  
9 for action-specific [Action > Color] and color-specific [Color > Action] BOLD activity.

10 These linear contrasts generated statistical parametric maps [SPM(T)]. The  
11 resulting contrast images were then further spatially smoothed (Gaussian kernel 5mm  
12 FWHM) and entered in a second-level analysis, corresponding to a random-effects  
13 model, accounting for inter-subject variance. One-sample t-tests were run on each  
14 group separately. Two-sample t-tests were then performed to compare these effects  
15 between groups (Blind vs Sighted) and to perform conjunction analyses to observe if  
16 the two groups presented similar activated networks for the two contrasts of interests.

17 **Connectivity analysis:** Psychophysiological interaction (PPI) analyses were  
18 computed to identify brain regions showing a significant change in the functional  
19 connectivity with seed regions (the right precuneus, the left pMTG and the rIPS) that  
20 showed a significant activation ( $p < .001$ , uncorrected) in the [(EB Conj. SC) X (Color >  
21 Action)] contrast, the [(EB Conj. SC) X (Action > Color)] contrast, and the [(SC > EB)  
22 X (Action > Color)] contrast respectively. In each individual, time series of activity  
23 (principal eigenvariate) were extracted from a 8 mm sphere centered on the nearest  
24 local maxima to the identified peaks in the second-level analysis (Note that centering  
25 the sphere on the peak itself does not change the ROI Analysis results, see  
26 Supplementary Information). New linear models were generated at the individual level,

## CONCEPTUAL KNOWLEDGE IN BLIND

1 using three regressors. One regressor represented the psychological condition of  
2 interest (action or color trial). The second regressor was the physiological activity  
3 extracted in the reference area. The third regressor represented the interaction of  
4 interest between the first (psychological) and the second (physiological) regressor. The  
5 design matrix also included movement parameters and a constant vector as regressors  
6 of no interest. A significant PPI indicated a change in the regression coefficients  
7 between any reported brain area and the seed region, related to the experimental  
8 conditions (Color>Action or Action>Color). Next, the individual summary statistic  
9 images obtained at the first-level (fixed-effects) analysis were spatially smoothed (5  
10 mm FWHM Gaussian kernel) and entered in a second-level (random-effects) analysis  
11 using a two-sample t test contrasting the two groups.

12 **ROI definition.** Occipital ROI for the PPI analyses were defined as following.  
13 Two peak-coordinates were taken from previous studies (Bedny et al. 2011; Kanjlia et  
14 al. 2016) showing the involvement of EB occipital areas in high-level functions such as  
15 language (left MOG [-36, -90, -1]) and mathematics (right MOG [33, -82, 9]). These  
16 areas also showed increased long range connectivity (in early blind) with frontal and  
17 parietal areas during rest (Bedny et al. 2011; Kanjlia et al. 2016; Liu et al. 2007;  
18 Collignon et al. 2013).

19 The V4 and V5 ROI were drawn from the literature, considering both perceptual  
20 localizers, as well as evidence from semantic/conceptual task. We selected 3 peak  
21 coordinates for area V5. The first [-47, -78, -2] from a highly-cited study contrasting the  
22 perception of visual motion vs static images (Dumoulin et al., 2000). The second [-44,  
23 -74, 2] from a study (Saygin, McCullough, Alac, & Emmorey, 2010) showing V5  
24 sensitivity to motion sentences (e.g., “The wild horse crossed the barren field”). The  
25 third from a research on the on-line meta-analysis tool Neurosynth  
26 (<http://neurosynth.org/>) for the topic “action”. In Neurosynth, the area in the occipital

## CONCEPTUAL KNOWLEDGE IN BLIND

1 cortex with the highest action-related activation was indeed V5 (peak coordinates: -50,  
2 -72, 2). To avoid ROI proliferation, we averaged these 3 peak-coordinates in order to  
3 obtain a single peak (average peak: -47, -75, 1).

4 As for V4, we selected the color-sensitive occipital ROI considering perceptual  
5 localizers, as well as evidence of color-specific activity from semantic/conceptual task.  
6 Fernandino et al. (Fernandino et al., 2015) reported a color sensitive area in the left  
7 posterior collateral sulcus (CoIS; at the intersection between the Lingual and the  
8 Fusyform gyrus; MNI peak coordinates: -16, -71, -12) associated with color-related  
9 words. This peak is close to the posterior-V4 localization done by Beauchamps and  
10 colleagues (peak coordinates: -22, -82, -16) in a MRI version of the Farnsworth–  
11 Munsell 100-Hue Test (Beauchamp, Haxby, Jennings, & DeYoe, 1999). A search in  
12 neurosynth with the keyword “color” also highlighted a left posterior color-sensitive  
13 region along the CoIS with peak coordinates [-24, -90, -10]. We averaged these 3  
14 peaks to find the center of our region of interest (average peak: -21, -81, -13).

15 The posterior lateral-temporal cortex ROI (PLTC) was taken from 3 studies  
16 showing semantic repetition suppression in that area. Bedny and colleagues (Bedny,  
17 McGill, and Thompson-Schill 2008) observed increased neural adaptation in PLTC  
18 (peak coordinates: 57, -36, 21) for repeated words (fan - fan), when the words were  
19 presented in a similar context (summer – fan; ceiling - fan), compared to when different  
20 context triggered different meanings (e.g., admirer – fan; ceiling – fan). This result  
21 conceptually replicated previous studies (Kotz, Cappa, Cramon, & Friederici, 2002;  
22 Wible et al., 2006) showing semantic adaptation in the bilateral PLTC for related (e.g.,  
23 dog - cat) vs unrelated (e.g., dog - apple) word pairs (peak coordinates: -42, -27, 9 and  
24 -51, -22, 8). These 3 peaks were averaged to find the center of our region of interest  
25 in both hemispheres (average peak:  $\pm 50$ , -28, 13).

26

## CONCEPTUAL KNOWLEDGE IN BLIND

### 1           **Statistical analysis.**

2           At the whole brain level, statistical inference was made at a corrected cluster  
3 level of  $P < 0.05$  FWE (with a standard voxel-level threshold of  $P < 0.001$  uncorrected)  
4 and a minimum cluster-size of 50 voxels. ROI analysis based on Small Volume  
5 Correction were thresholded at  $p < 0.05$  FEW at the voxel level.

6           All ROI analyses were performed using Small Volume Correction using  
7 spheres with a 10mm radius centered around the ROI peak coordinates (see previous  
8 session). Within the ROI, results were considered significant at a threshold of  $p < 0.05$ ,  
9 FEW-corrected. Here, and throughout the paper, brain coordinates are reported in MNI  
10 space.

11          Behavioral data, analysis code and t-maps from the main contrasts will be  
12 made available on-line (<https://www.biorxiv.org/content/early/2018/08/23/384552>).  
13 Row fMRI images will be made available upon request, following agreements with our  
14 ethical board committee.

15

### 16   **Results**

17   **Within-category similarity is encoded in occipital areas in the sighted but not in**  
18 **the blind.** The rationale behind adaptation analyses was that the direct contrast  
19 between pairs with high versus low perceptual differences will display neural  
20 adaptation (Barron et al., 2016; Grill-Spector, Henson, & Martin, 2006; Wheatley,  
21 Weisberg, Beauchamp, & Martin, 2005) therefore probing regions that are specifically  
22 sensitive to the *perceptual distance* between concepts.

23   *Behavioral analysis:* Similarity ratings were highly correlated between sighted and  
24 blind, both for action ( $r = .99$ ) and color concepts ( $r = .93$ ; Fig. 1A). In order to perform  
25 the adaptation analysis we divided the trials in similar pairs (e.g. red - orange) and  
26 different pairs (e.g. red - blue), based on each participant' subjective ratings. Rating

## CONCEPTUAL KNOWLEDGE IN BLIND

1 distributions for each subject and category (color, action) were divided in 5 intervals  
2 with a similar number of items (see Method session for details). Stimulus-pairs in the  
3 first two intervals were labeled as different (low similarity ratings), the 3<sup>rd</sup> interval  
4 contained medium pairs, and the 4<sup>th</sup>-5<sup>th</sup> intervals similar pairs (high similarity ratings;  
5 Fig 1B). Overall, the average number of “different” trials was slightly larger than the  
6 “similar” ones (126 vs 115;  $F(1,33)=8.41$ ,  $p=0.007$ ,  $\eta^2=0.20$ ; Fig. 1C). However, there  
7 was no similarity by group interaction ( $F(1,33)=0.18$ ,  $p=0.67$ ,  $\eta^2=0.004$ ), indicating  
8 that this unbalance (that reflected personal judgments of similarity) was the same  
9 across SC and EB (fig. 1C). An analysis of reaction times showed that Medium pairs  
10 (not analyzed in fMRI) had on average longer latencies than Similar and Different ones  
11 (Main Effect of Similarity:  $F(2,66)=21.07$ ,  $p<0.001$ ,  $\eta^2=0.38$ ). This was expected since  
12 pairs that are neither similar nor different would require longer and more difficult  
13 judgments. Crucially, there was no difference in reaction times between different  
14 (Mean=1.80 sec, SD=0.39) and similar pairs (Mean=1.79 sec, SD=0.37;  $F(1,33)=0.09$ ,  
15  $p=0.76$ ,  $\eta^2=0.003$ ), and no interaction between Similarity and Group ( $F(1,33)=0.04$ ,  
16  $p=0.84$ ,  $\eta^2=0.001$ ; Fig 1D).

17

## CONCEPTUAL KNOWLEDGE IN BLIND

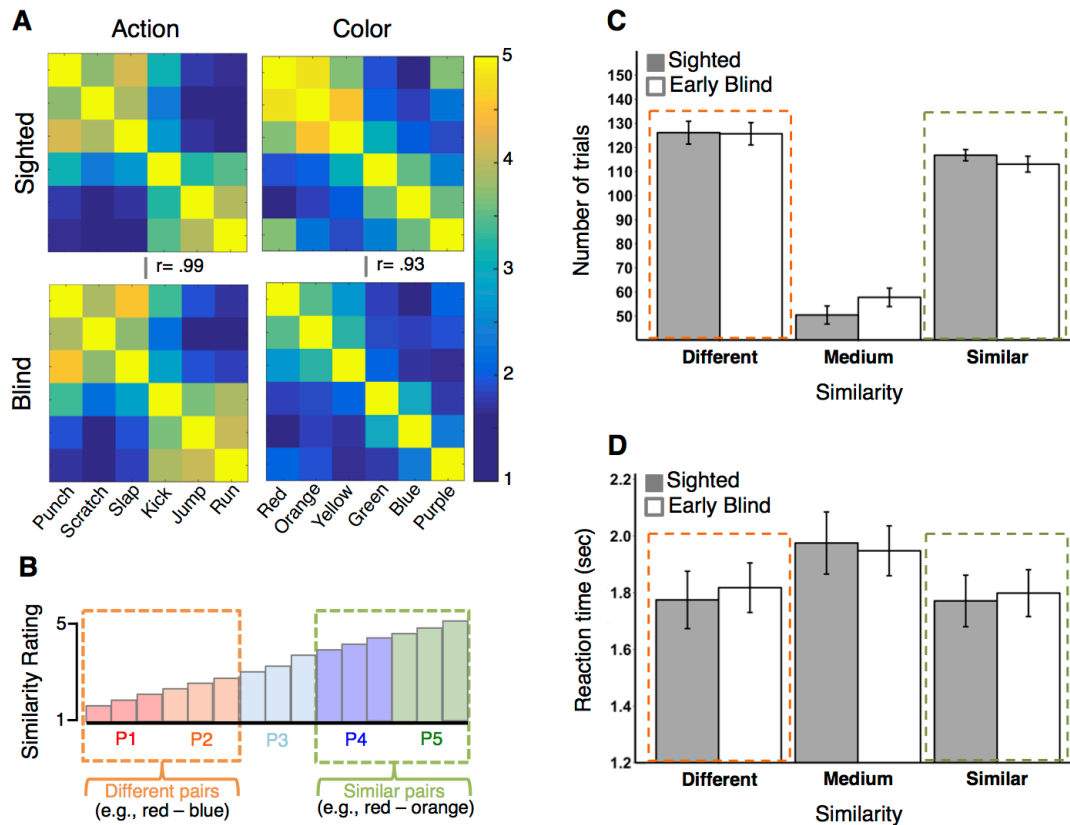

1

2 **Figure 1. Adaptation, behavioral analysis.** (A) Similarity judgments were highly correlated  
 3 across groups both for actions and color; (B) Conceptual schema of the division of word pairs  
 4 in “different” and “similar” based on subjective similarity ratings; (C) Barplot depicting the  
 5 average number of items in the “different”, “medium” and “similar” categories. The number of  
 6 items in the “different” and “similar” categories is very similar across groups (number of trials  $\pm$   
 7 SEM); (D) Barplot depicting the average reaction time in the “different”, “medium”, and “similar”  
 8 categories. The average RTs of the “different” and “similar” categories is very similar across  
 9 groups (seconds  $\pm$  SEM).

10

11 *fMRI analysis:* to find brain areas that showed adaptation based on conceptual  
 12 similarity, we looked at the contrast Different Pairs > Similar Pairs, with Medium pairs  
 13 as a regressor of no interest. Action and color pairs were considered together since,  
 14 at the whole brain level, we did not find a significant higher-order interaction between  
 15 Similarity (different, similar) and Category (see the method section for analysis details).  
 16 In the sighted, similar concepts led to repetition suppression in several occipital areas  
 17 (See Fig. 2A), with a significant cluster in and around the left lingual gyrus (peak  
 18 coordinates: -24, -70, -7). In the blind, instead, adaptation emerged in language-related  
 19 areas with significant clusters along the middle and superior temporal gyrus, bilaterally



## CONCEPTUAL KNOWLEDGE IN BLIND

1 (Peak coordinates RH: 57, -28, 8; LH: -60, -10, -7) and in the right precentral gyrus  
2 (Peak coordinates: 27, -25, 56; Fig. 2B). Importantly, no adaptation in posterior  
3 occipital areas was observed in the blind.

4 A comparison between groups showed greater adaptation in occipital cortices  
5 for sighted compared to blind (Fig. 2C), with peaks in the left superior occipital gyrus  
6 (-24, -91, 26), the left lingual gyrus (-24, -70, -7) and the right middle occipital gyrus  
7 (27, -85, 11). The contrast Blind > Sighted showed increased adaptation in posterior  
8 lateral temporal cortices (PLTC) bilaterally (Fig. 2D). Planned ROI analysis in PLTC, a  
9 region that consistently show repetition suppression for semantic similarity (Bedny,  
10 McGill, and Thompson-Schill 2008; Wible et al. 2006; Kotz et al. 2002), revealed a  
11 significantly greater adaptation for similar concepts in blind more than sighted  
12 (Conceptual Similarity by Group interaction; lPLTC= -45 -31 20,  $t(33)=3.23$ ,  $P=0.035$ ;  
13 rPLTC= 45 -28 11,  $t(33)=3.41$ ,  $P=0.024$ ).

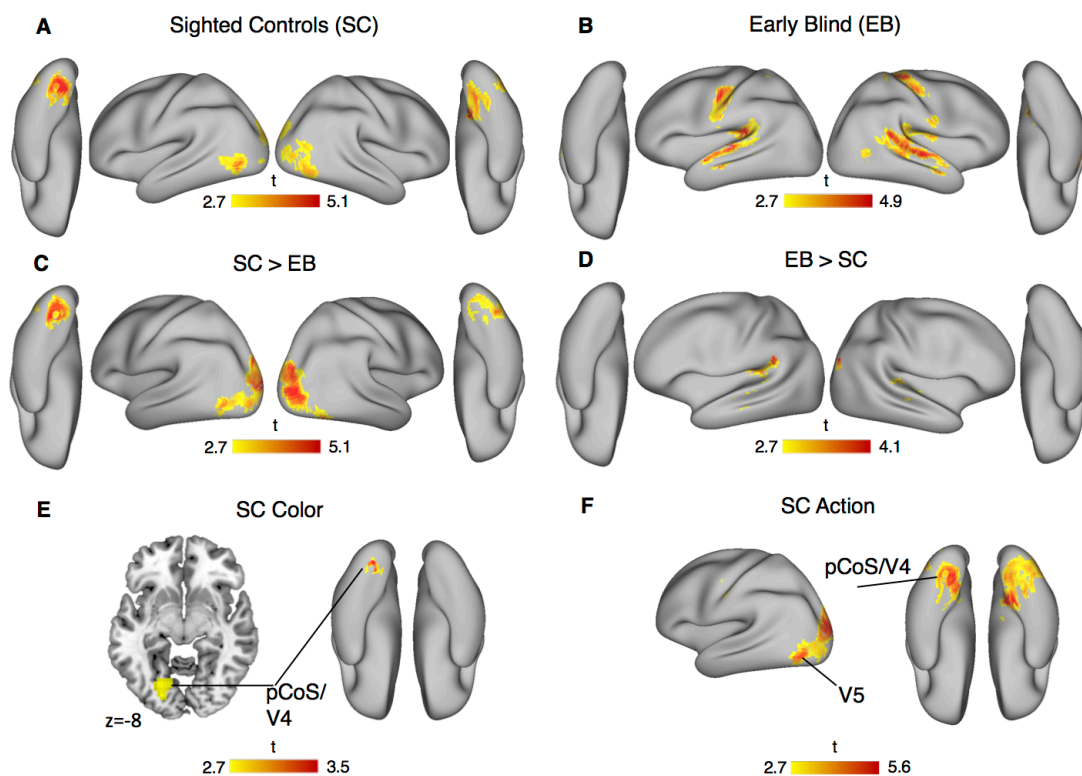

14

15 **Figure 2. Adaptation, fMRI results.** Regional BOLD responses are rendered over Conte-  
16 69 average midthickness surfaces. (A) Suprathreshold clusters showing neural adaptation for

## CONCEPTUAL KNOWLEDGE IN BLIND

1 similar word pairs in the occipital cortices of sighted participants; (B) Suprathreshold clusters  
2 showing neural adaptation for similar word pairs in the temporal and somatosensory-motor  
3 cortices of early blind participants; (C) Suprathreshold clusters showing neural adaptation for  
4 similar word pairs in sighted compared to blind, and (D) blind compared to sighted; (E)  
5 Suprathreshold cluster showing neural adaptation for similar color-word pairs in the sighted,  
6 with regional activity precisely localized in the left PCoS/V4 (see Fernandino et al. 2015 for a  
7 very similar result with a multivariate design); (F) Suprathreshold clusters showing neural  
8 adaptation for similar action-word pairs in the sighted, with regional activity spread in different  
9 occipital areas including the left PCoS/V4 and the left V5. Cluster threshold at  $P < 0.005$   
10 uncorrected, for illustration only.  
11

12 Finally, we performed planned ROI analysis in the color-sensitive region at the  
13 posterior banks of the collateral sulcus (PCoS) corresponding to the V4-complex  
14 (Beauchamp et al., 1999; Fernandino et al., 2015) and the motion sensitive region V5  
15 (Dumoulin et al., 2000). In area PCoS-V4 we found greater adaptation both for color  
16 and action in sighted compared to blind (Conceptual Similarity by Group interaction;  
17 peak= -24 -73 -10,  $t(33)=4.26$ ,  $P= 0.004$ ; Fig 2 E-F). In contrast, the analysis in V5  
18 showed that repetition suppression was specific for action concepts in the sighted and  
19 no adaptation was observed in the blind (Conceptual Similarity by Group by Category  
20 interaction; Peak: -51 -76 8,  $t(33)=3.29$ ,  $P= 0.037$ ; Fig 2F).

21

22 **Brain regions active in sighted and blind when contrasting action and color**  
23 **concepts.** Subsequently we ran classic univariate analysis, comparing items across  
24 categories independently of their similarity, to find category-specific activations across  
25 sighted and blind. In these analyses, the two words in each pair were considered as a  
26 single trial.

27 *Behavioral analysis:* Reaction times analysis using a mixed ANOVA, with Category  
28 (action, color) as within-subject factor and Group (sighted, blind) as between-subjects  
29 factor, showed no difference between categories ( $F(1,33)=2.37$ ,  $p>0.05$ ,  $\eta^2= 0.07$ ),  
30 between groups ( $F(1,33)=0.074$ ,  $p>0.05$ ,  $\eta^2=0.002$ ) and no Category by Group  
31 interaction ( $F(1,33)=0.69$ ,  $p>0.05$ ,  $\eta^2=0.02$ ).

## CONCEPTUAL KNOWLEDGE IN BLIND

1 *fMRI analysis*: The contrast Action > Color did not reveal any significant difference  
2 between groups, suggesting a comparable categorical representation of action  
3 concepts, across sighted and blind (see fig. S2 for details). Indeed, a conjunction  
4 analysis between groups showed a common significant activation in the left posterior  
5 middle temporal gyrus (lpMTG; Peak= -54, -61, 5; Fig 3A).

6 On the other hand, a conjunction analysis between groups for Color > Action  
7 did not reveal any common activation between sighted and blind after correction for  
8 multiple comparisons at the whole brain level. However, displaying the conjunction  
9 results at a more lenient threshold ( $p < .001$  uncorrected; Fig 3C), we could notice a  
10 unique common activity for color concepts in the right precuneus (peak= 6, -55, 26).  
11 Accordingly, analysis within groups showed a significant precuneus activity in the blind  
12 (peak= 6, -52, 20,  $p = .04$ ) and a marginally significant activity in the sighted (peak= 0,  
13 -61, 29,  $p = .06$ ), with no significant difference between groups (Table S1; Fig. S1).

14 Further analysis for the contrast Color > Action revealed a cluster in the right  
15 parietal cortex, in and around the right intraparietal sulcus (rIPS), showing higher  
16 activity for color concepts in sighted compared to blind (peak= 33, -43, 35; Fig. 3B).

17 Altogether these results show similar patterns of activity during conceptual  
18 processing in sighted and blind, when categorical preferences are investigated  
19 (independently of perceptual similarity). As in previous results (Bedny et al., 2012; Uta  
20 Noppeney et al., 2003; van den Hurk et al., 2017) such common activities are found  
21 outside the posterior occipital cortex, in areas that are considered to be highly  
22 polymodal such as the precuneus and the lpMTG (Binder, Desai, Graves, & Conant,  
23 2009). Interestingly, even at this level of comparison we could find an effect of visual  
24 deprivation, concerning color knowledge, that seem to involve the right IPS more in  
25 sighted than blind.

## CONCEPTUAL KNOWLEDGE IN BLIND

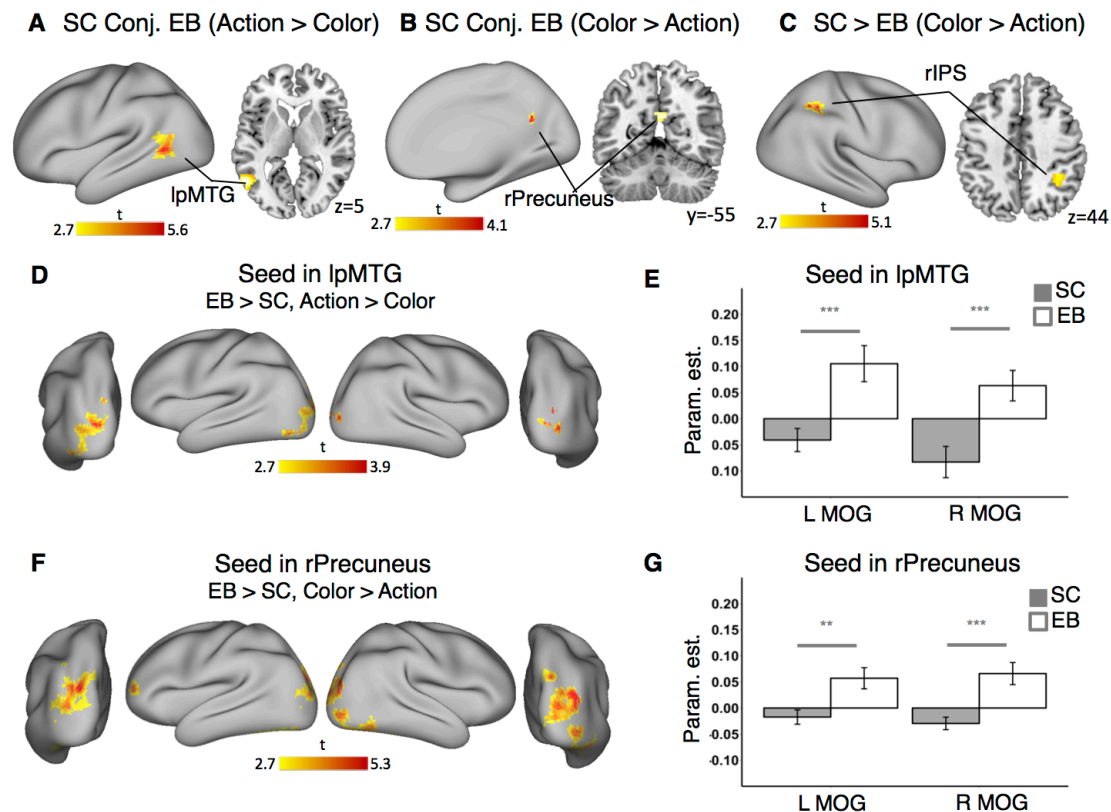

1

2 **Figure 3. Contrasts between categories and psychophysiological interactions.** Regional  
3 BOLD responses are rendered over Conte-69 average midthickness surfaces. (A)  
4 Suprathreshold cluster ( $P < 0.05$  FEW corrected) showing common activity in the lpMTG for the  
5 contrast Action > Color in both sighted and early blind (conj., conjunction analysis); (B)  
6 Suprathreshold cluster ( $P < 0.001$  uncorrected; for illustrative purposes only) showing common  
7 activity in the precuneus for the contrast Color > Action in both sighted and early blind (conj.,  
8 conjunction analysis); (C) Suprathreshold cluster ( $P < 0.05$  FEW corrected) showing greater  
9 activity in the rIPS, in sighted compared to early blind, for the contrast Color > Action; (D)  
10 Suprathreshold clusters ( $P < 0.005$  uncorrected; for illustrative purposes only) showing greater  
11 connectivity in the occipital areas of early blind people with the lpMTG (PPI for the contrast  
12 Action > Color); (E) Barplot (for illustrative purposes only) showing beta weights derived from  
13 PPI analysis, with seed in lpMTG, in sighted (gray) and blind (white), in the right and left  
14 middle occipital gyrus (MOG) for the contrast Action > Color (arbitrary unit  $\pm$  SEM); (F) Suprathreshold  
15 clusters ( $P < 0.005$  uncorrected; for illustrative purposes only) showing greater connectivity  
16 in the occipital areas of early blind people with the precuneus (PPI for the contrast Color > Action);  
17 (G) Barplot (for illustrative purposes only) showing beta weights derived from PPI analysis,  
18 with seed in precuneus, in sighted (gray) and blind (white), in the right and left middle  
19 occipital gyrus (MOG) for the contrast Color > Action (arbitrary unit  $\pm$  SEM).  
20

21 **Psychophysiological interactions: The precuneus and lpMTG display similar**  
22 **category selectivity across sighted and blind but show different connectivity**  
23 **profiles.** Finally, we relied on Psychophysiological Interaction (PPI) analysis (Friston  
24 et al., 1997; O'Reilly, Woolrich, Behrens, Smith, & Johansen-berg, 2012) to test  
25 whether regions that showed similar categorical preference across groups (lpMTG for

## CONCEPTUAL KNOWLEDGE IN BLIND

1 action > color, and the precuneus for color > action) also maintain a similar connectivity  
2 profile in both groups. In particular, we tested the hypothesis that posterior occipital  
3 areas in the blind could be recruited during conceptual retrieval, and connect with  
4 conceptual hubs (Binder et al., 2009) such as the lpMTG and the Precuneus, as a  
5 consequence of neural reorganization (Amedi, Raz, Pianka, Malach, & Zohary, 2003;  
6 Burton, 2003). With this aim, we selected two ROIs in the left and right middle occipital  
7 gyrus (MOG) that are recruited in early blind during high-level conceptual tasks such  
8 as language processing and math (Kanjlia et al. 2016; Bedny et al. 2011); and show  
9 increased long range connectivity, in early blind, with extra-occipital regions (e.g.,  
10 frontal, parietal and ventral temporal cortices) during resting state (Bedny et al. 2011;  
11 Kanjlia et al. 2016; Liu et al. 2007; Collignon et al. 2013) and task-based (PPI) analysis  
12 (Noppeney, Friston, and Price 2003).

13 PPI with seed in the lpMTG revealed an increase of action-selective functional  
14 connectivity in both occipital ROIs of blind people compared to their sighted  
15 counterpart (lMOG:  $t(33)= 3.59$ ,  $p= 0.02$ ; rMOG:  $t(33)=3.46$ ,  $p=0.026$ ; Fig 1D & 1E).  
16 Similarly, PPI with seed in the precuneus revealed an increase of color-selective  
17 functional connectivity in the occipital cortex of blind compared to sighted participants  
18 (lMOG:  $t(33)= 3.12$ ,  $p= 0.054$ ; rMOG:  $t(33)=4.09$ ,  $p=0.007$ ; Fig 1F and 1G). Albeit  
19 showing a similar activity profile in sighted and blind during conceptual processing, the  
20 lpMTG and the precuneus showed a different connectivity profile as a function of early  
21 visual deprivation. Such increase in task-based connectivity suggests that occipital  
22 areas in early blind, albeit not coding for perceptual similarity as in the sighted, are  
23 however active during conceptual retrieval and can be flexibly recruited in interaction  
24 with conceptual hubs such as the precuneus and the pMTG.

25

26

## CONCEPTUAL KNOWLEDGE IN BLIND

1

### 2 **Discussion**

3           Embodied approaches to conceptual knowledge suggest that concepts are  
4 grounded in our sensory and motor experience of the world (Barsalou, 1999; Binder &  
5 Desai, 2011). A straightforward hypothesis emerging from these theories is that people  
6 that perceive the world in a different way should also have different conceptual  
7 representations (Casasanto, 2011).

8           In our study we tested this hypothesis by characterizing the brain activity of  
9 sighted and early blind individuals while they rated the perceptual similarity of action  
10 and color concepts in fMRI. In particular, we investigated which brain regions encode  
11 the perceptual similarity of retrieved concepts using an adaptation paradigm. Results  
12 in the sighted group showed that word-pairs referring to similar colors or actions  
13 induced repetition suppression in several posterior occipital regions, including areas  
14 V3, V4 and V5. In striking contrast, early blind participants did not show repetition  
15 suppression in posterior occipital areas but instead showed a greater adaptation for  
16 concept similarity in language-related regions, disclosing a different neurobiology of  
17 concepts as a function of visual deprivation.

18           Posterior occipital regions are known to encode visual features in the sighted  
19 and to be sensitive to visual similarity independently of categorical membership (Bracci  
20 and Op de Beeck 2016; Connolly et al. 2012; Kriegeskorte et al. 2008; Naselaris et al.  
21 2009). Our data corroborate the hypothesis that these regions are also involved in  
22 conceptual retrieval (Borghesani et al., 2016; Fernandino et al., 2015) supporting  
23 information related to the visual appearance of objects and events, that is not available  
24 to blind people. This result is crucial to support the hypothesis that conceptual retrieval  
25 consists, in part, on replay of our perceptual experience (Barsalou, 1999; Harnad,  
26 1990).

## CONCEPTUAL KNOWLEDGE IN BLIND

1           Since posterior occipital regions represent visual features also during  
2 conceptual retrieval (Borghesani et al., 2016; Fernandino et al., 2015; Mitchell et al.,  
3 2008), it is therefore expected, as observed in our study, that sighted and blind should  
4 show different activity in these regions due to the lack of visual qualia in the blind  
5 population. Our results are in line with a previous study showing that relatively anterior  
6 regions such as the pMTG and part of the VOTC show a similar functional and  
7 connectivity fingerprint in sighted and blind (Wang et al., 2015), whereas this similarity  
8 decreases strikingly in more posterior occipital regions (i.e., approximately behind the  
9 conventional line that separate the temporal from the occipital lobe; Wang et al. 2015).  
10 Actually, the posterior occipital regions showing higher conceptual adaptation in  
11 sighted compared to blind in our study tightly overlap with regions showing the lowest  
12 functional and connectivity similarity between sighted and blind in Wang et al. study  
13 (Wang et al. 2015; Fig. S2).

14           Reduced adaptation in the occipital cortex in our blind participant (compared to  
15 sighted) coincides with stronger adaptation in the posterior lateral-temporal cortices  
16 (PLTC). Several studies have found that conceptually similar (e.g., dog - wolf) or  
17 semantically associated (e.g., dog - leash) words can lead to repetition suppression in  
18 PLTC (Wible et al. 2006; Kotz et al. 2002; Bedny, McGill, and Thompson-Schill 2008).  
19 Although it is still unclear what level of conceptual knowledge is represented in that  
20 region (Bedny, McGill, and Thompson-Schill 2008), there is some agreement that the  
21 PLTC stores auditory representations of words, that are connected to distributed  
22 semantic representations in the brain (Hickok and Poeppel 2007; Gow 2012; Bedny,  
23 McGill, and Thompson-Schill 2008; Mirman et al. 2015). In this framework, the PLTC  
24 may work at the interface between wordforms and semantic knowledge (Gow, 2012;  
25 Hickok & Poeppel, 2007), and a greater activity in the blind can index a larger use of  
26 verbal knowledge in this population (Cattaneo et al., 2008; Crollen et al., 2014).

## CONCEPTUAL KNOWLEDGE IN BLIND

1           Directly contrasting different categories (Action Vs Color), independently of  
2 within-category similarity, showed instead some commonalities in brain activity across  
3 the two groups (Bedny et al. 2012; Noppeney, Friston, and Price 2003; Peelen et al.  
4 2014). Both sighted and blind engaged the lpMTG during action processing and the  
5 Precuneus during color processing. These regions are located outside of the visual  
6 cortex, in polymodal areas, that typically display category-specificity in a format that is  
7 at least partially independent from perceptual appearance (Bracci & Op de Beeck,  
8 2016; Peelen & Downing, 2017) and largely resilient to visual deprivation (Bedny et al.,  
9 2012; Uta Noppeney et al., 2003; Wang et al., 2015).

10           Interestingly, though, psychophysiological interactions (PPI) showed that early  
11 visual deprivation changes the connectivity profile of these regions, increasing their  
12 functional coupling with occipital regions in the blind. These results suggest that the  
13 occipital cortex in early blind is re-organized to extend its integration into conceptual  
14 selective networks, highlighting further how visual deprivation impact on the  
15 neurobiology of conceptual knowledge. Previous studies have shown that occipital  
16 areas in the early blind are recruited for high-level conceptual tasks such as language  
17 processing, semantic retrieval and math (Bedny et al. 2011; Kanjlia et al. 2016; Burton,  
18 Diamond, and McDermott 2003; Van Ackeren et al. 2018; Crollen et al. 2018; See also  
19 Fig. S3 showing general higher activity in the blind occipital cortex during the auditory  
20 presentation of words), and that they increase long-range connectivity with frontal and  
21 parietal cortices during rest (Bedny et al. 2011; Kanjlia et al. 2016; Liu et al. 2007;  
22 Collignon et al. 2013) and inferior temporal cortices during semantic judgments  
23 (Noppeney, Friston, and Price 2003). Notably, graph-theoretic metrics of regional  
24 cortical thickness covariance found that language and visual regions showed a pattern  
25 of merging into shared modules in the blind but not in sighted (Hasson, Andric, Atilgan,  
26 & Collignon, 2016). Extending those previous studies, we show here that early blinds



## CONCEPTUAL KNOWLEDGE IN BLIND

1 seem to rely on enhanced connectivity between occipital cortices and temporo-parietal  
2 conceptual hubs during conceptual processing. Albeit our data remain correlational,  
3 they suggest that EBs' occipital regions are not activated independently of other  
4 "classic" regions involved in conceptual retrieval, but they instead work in concert.

5         These results suggest that occipital cortices are involved in conceptual retrieval  
6 in both sighted and blind, but with different functions and probably at different levels of  
7 representation. Occipital areas may support sensorimotor simulations of visual  
8 features during conceptual retrieval in the sighted, showing adaptation for concepts  
9 that refer to visually similar objects or events; on the other hand, in the blind, occipital  
10 cortices do not encode perceptual similarity, but may be re-organized to engage in  
11 more general processes related to conceptual retrieval (albeit these processes need  
12 to be better specified; see for instance, Bedny 2017; Van Ackeren et al. 2018).

13         Outside the posterior occipital cortex, we found that the posterior portion of the  
14 right IPS showed a stronger preference for color trials in the sighted compared to the  
15 blind. The IPS is known to be involved in the perception of color (Beauchamp et al.,  
16 1999; Cheadle & Zeki, 2014; Zeki & Stutters, 2013) as well as other visual features  
17 (Grill-Spector, 2003; Swisher, Halko, Merabet, McMains, & Somers, 2007; Xu, 2007),  
18 and its anatomical position make it a good candidate to work at the interface between  
19 perceptual and conceptual representations (Cheadle & Zeki, 2014). In particular, it  
20 seems to be crucial for retrieving perceptually-based categorical knowledge (Cheadle  
21 & Zeki, 2014; Zeki & Stutters, 2013). Indeed, the peak of color-specific activity that we  
22 found (peak coordinates: 33, -43, 35) is very close to the color-specific rIPS area found  
23 by Cheadle & Zeki (2014; peak coordinates: 30, -39, 45). The lack of visual input in  
24 blind people prevents the formation of perceptually-driven color representations, which  
25 may limit the contribution of the IPS during the retrieval of color knowledge. This is not  
26 the case for action representation, for which perceptual knowledge can be more easily

## CONCEPTUAL KNOWLEDGE IN BLIND

1 compensated by other senses (e.g., touch, audition) in the blind. The distinct impact of  
2 blindness on the broader categorical responses to action and colors again highlight  
3 how visual experience may selectively shape the neurobiology of conceptual  
4 representations, even in putatively multimodal areas of the brain.

5 From a broader theoretical point of view, the results of this study are in line with a  
6 hierarchical model of conceptual representations based on progressive levels of  
7 abstraction (Barsalou, 2016; Binder, 2016; Binder et al., 2016; Fernandino et al., 2015;  
8 A. Martin, 2015). At the top of the hierarchy, multimodal representations may co-exist  
9 with purely symbolic ones organized in a linguistic/propositional code (Mahon &  
10 Caramazza, 2008). This level of representation can account for the obvious fact that  
11 congenitally blind people can think about colors and their perceptual properties  
12 (Barilari, de Heering, Crollen, Collignon, & Bottini, 2018; Marmor, 1978) although they  
13 cannot simulate vision. On the other hand, modality-specific simulation in sensory  
14 areas (e.g. visual, auditory, somatosensory), as the one highlighted by our adaptation  
15 analysis, may become central in deeper and more deliberate stages of conceptual  
16 processing, providing situated, specific and sometimes imaginistic representations,  
17 and eventually supporting the subjective experience of knowing providing the  
18 phenomenological qualia of conscious thinking (Binder et al., 2016; Koch, Massimini,  
19 Boly, & Tononi, 2016).

20

## CONCEPTUAL KNOWLEDGE IN BLIND

### 1 **References**

- 2 Amedi, A., Raz, N., Pianka, P., Malach, R., & Zohary, E. (2003). Early “visual” cortex  
3 activation correlates with superior verbal memory performance in the blind.  
4 *Nature Neuroscience*, 6(7), 758–66. <http://doi.org/10.1038/nn1072>
- 5 Barilari, M., de Heering, A., Crollen, V., Collignon, O., & Bottini, R. (2018). Is Red  
6 Heavier Than Yellow Even for Blind? *I-Perception*, 9(1), 204166951875912.  
7 <http://doi.org/10.1177/2041669518759123>
- 8 Barron, H. C., Garvert, M. M., & Behrens, T. E. J. (2016). Repetition suppression: a  
9 means to index neural representations using BOLD? *Philosophical Transactions*  
10 *of the Royal Society B: Biological Sciences*, 371(1705), 20150355.  
11 <http://doi.org/10.1098/rstb.2015.0355>
- 12 Barsalou, L. W. (1999). Perceptual Symbol Systems. *Behavioral and Brain Science*,  
13 30322(September 2001), 577–660.
- 14 Barsalou, L. W. (2009). Simulation, situated conceptualization, and prediction.  
15 *Philosophical Transactions of the Royal Society B: Biological Sciences*,  
16 364(1521), 1281–1289. <http://doi.org/10.1098/rstb.2008.0319>
- 17 Barsalou, L. W. (2016). On Staying Grounded and Avoiding Quixotic Dead Ends.  
18 *Psychonomic Bulletin & Review*, 23(4), 1122–1142.  
19 <http://doi.org/10.3758/s13423-016-1028-3>
- 20 Beauchamp, M. S., Haxby, J. V., Jennings, J. E., & DeYoe, E. A. (1999). An fMRI  
21 version of the farnsworth-munsell 100-hue test reveals multiple color-selective  
22 areas in human ventral occipitotemporal cortex. *Cerebral Cortex*, 9(3), 257–263.  
23 <http://doi.org/10.1093/cercor/9.3.257>
- 24 Bedny, M. (2017). Evidence from Blindness for a Cognitively Pluripotent Cortex.  
25 *Trends in Cognitive Sciences*, 21(9), 637–648.  
26 <http://doi.org/10.1016/j.tics.2017.06.003>

## CONCEPTUAL KNOWLEDGE IN BLIND

- 1 Bedny, M., Caramazza, a, Pascual-Leone, a, & Saxe, R. (2012). Typical neural  
2 representations of action verbs develop without vision. *Cerebral Cortex (New*  
3 *York, N.Y. : 1991)*, 22(2), 286–93. <http://doi.org/10.1093/cercor/bhr081>
- 4 Bedny, M., McGill, M., & Thompson-Schill, S. L. (2008). Semantic adaptation and  
5 competition during word comprehension. *Cerebral Cortex*, 18(11), 2574–2585.  
6 <http://doi.org/10.1093/cercor/bhn018>
- 7 Bedny, M., Pascual-Leone, A., Dodell-Feder, D., Fedorenko, E., & Saxe, R. (2011).  
8 Language processing in the occipital cortex of congenitally blind adults.  
9 *Proceedings of the National Academy of Sciences*, 108(11), 4429–4434.  
10 <http://doi.org/10.1073/pnas.1014818108>
- 11 Bedny, M., & Saxe, R. (2012). Insights into the origins of knowledge from the  
12 cognitive neuroscience of blindness. *Cognitive Neuropsychology*, 29(1–2), 56–  
13 84. <http://doi.org/10.1080/02643294.2012.713342>
- 14 Binder, J. R. (2016). In defense of abstract conceptual representations. *Psychonomic*  
15 *Bulletin & Review*, 23(4), 1096–1108. <http://doi.org/10.3758/s13423-015-0909-1>
- 16 Binder, J. R., Conant, L. L., Humphries, C. J., Fernandino, L., Simons, S. B., Aguilar,  
17 M., & Desai, R. H. (2016). Toward a brain-based componential semantic  
18 representation. *Cognitive Neuropsychology*, 33(3–4), 130–174.  
19 <http://doi.org/10.1080/02643294.2016.1147426>
- 20 Binder, J. R., & Desai, R. H. (2011). The neurobiology of semantic memory. *Trends*  
21 *in Cognitive Sciences*, 15(11), 527–536.  
22 <http://doi.org/10.1016/j.tics.2011.10.001>
- 23 Binder, J. R., Desai, R. H., Graves, W. W., & Conant, L. L. (2009). Where is the  
24 semantic system? A critical review and meta-analysis of 120 functional  
25 neuroimaging studies. *Cerebral Cortex*, 19(December), 2767–2796.  
26 <http://doi.org/10.1093/cercor/bhp055>

## CONCEPTUAL KNOWLEDGE IN BLIND

- 1 Boersma, P., & Weenink, D. (2018). Praat: doing phonetics by computer. Retrieved  
2 from <http://www.praat.org/>
- 3 Borghesani, V., Pedregosa, F., Buiatti, M., Amadon, A., Eger, E., & Piazza, M.  
4 (2016). Word meaning in the ventral visual path: a perceptual to conceptual  
5 gradient of semantic coding. *NeuroImage*, *143*, 128–140.  
6 <http://doi.org/10.1016/j.neuroimage.2016.08.068>
- 7 Bracci, S., & Op de Beeck, H. (2016). Dissociations and associations between shape  
8 and category representations in the two visual pathways. *Journal of*  
9 *Neuroscience*, *36*(2), 432–444. [http://doi.org/10.1523/JNEUROSCI.2314-](http://doi.org/10.1523/JNEUROSCI.2314-15.2016)  
10 [15.2016](http://doi.org/10.1523/JNEUROSCI.2314-15.2016)
- 11 Burton, H. (2003). Visual cortex activity in early and late blind people. *The Journal of*  
12 *Neuroscience: The Official Journal of the Society for Neuroscience*, *23*(10),  
13 4005–4011.
- 14 Burton, H., Diamond, J. B., & McDermott, K. B. (2003). Dissociating cortical regions  
15 activated by semantic and phonological tasks: a fMRI study in blind and sighted  
16 people. *Journal of Neurophysiology*, *90*(3), 1965–82.  
17 <http://doi.org/10.1152/jn.00279.2003>
- 18 Casasanto, D. (2011). Different Bodies, Different Minds: The Body Specificity of  
19 Language and Thought. *Current Directions in Psychological Science*, *20*(6),  
20 378–383. <http://doi.org/10.1177/0963721411422058>
- 21 Cattaneo, Z., Vecchi, T., Cornoldi, C., Mammarella, I., Bonino, D., Ricciardi, E., &  
22 Pietrini, P. (2008). Imagery and spatial processes in blindness and visual  
23 impairment. *Neuroscience and Biobehavioral Reviews*, *32*(8), 1346–1360.  
24 <http://doi.org/10.1016/j.neubiorev.2008.05.002>
- 25 Cheadle, S. W., & Zeki, S. (2014). The role of parietal cortex in the formation of color  
26 and motion based concepts. *Frontiers in Human Neuroscience*, *8*(July), 535.

## CONCEPTUAL KNOWLEDGE IN BLIND

- 1 <http://doi.org/10.3389/fnhum.2014.00535>
- 2 Collignon, O., Dormal, G., Albouy, G., Vandewalle, G., Voss, P., Phillips, C., &  
3 Lepore, F. (2013). Impact of blindness onset on the functional organization and  
4 the connectivity of the occipital cortex. *Brain*, *136*(9), 2769–2783.  
5 <http://doi.org/10.1093/brain/awt176>
- 6 Connolly, A. C., Guntupalli, J. S., Gors, J., Hanke, M., Halchenko, Y. O., Wu, Y.-C.,  
7 ... Haxby, J. V. (2012). The representation of biological classes in the human  
8 brain. *The Journal of Neuroscience: The Official Journal of the Society for*  
9 *Neuroscience*, *32*(8), 2608–18. <http://doi.org/10.1523/JNEUROSCI.5547->  
10 [11.2012](http://doi.org/10.1523/JNEUROSCI.5547-11.2012)
- 11 Crollen, V., Lazzouni, L., Bellemare, A., Rezk, M., Lepore, F., Noel, M.-P., ...  
12 Collignon, O. (2018). Recruitment of occipital cortex by arithmetic processing  
13 follows computational bias in early blind. *BioRxiv Preprint*.
- 14 Crollen, V., Noël, M. P., Seron, X., Mahau, P., Lepore, F., & Collignon, O. (2014).  
15 Visual experience influences the interactions between fingers and numbers.  
16 *Cognition*, *133*(1), 91–96. <http://doi.org/10.1016/j.cognition.2014.06.002>
- 17 Dumoulin, S. O., Bittar, R. G., Kabani, N. J., Baker, C. L., Le Goualher, G., Bruce  
18 Pike, G., & Evans, A. C. (2000). A new anatomical landmark for reliable  
19 identification of human area V5/MT: a quantitative analysis of sulcal patterning.  
20 *Cerebral Cortex*, *10*(5), 454–463. <http://doi.org/10.1093/cercor/10.5.454>
- 21 Fernandino, L., Binder, J. R., Desai, R. H., Pendl, S. L., Humphries, C. J., Gross, W.  
22 L., ... Seidenberg, M. S. (2015). Concept representation reflects multimodal  
23 abstraction: A framework for embodied semantics. *Cerebral Cortex*, 1–17.  
24 <http://doi.org/10.1093/cercor/bhv020>
- 25 Fodor, J. (1975). *The language of thought*. Cambridge: Harvard University Press.
- 26 Friston, K. J., Buechel, C., Fink, G. R., Morris, J., Rolls, E., & Dolan, R. J. (1997).

## CONCEPTUAL KNOWLEDGE IN BLIND

- 1        Psychophysiological and modulatory interactions in neuroimaging. *Neuroimage*,  
2        6(3), 218–229. <http://doi.org/10.1006/nimg.1997.0291>
- 3        Gow, D. W. (2012). The cortical organization of lexical knowledge: A dual lexicon  
4        model of spoken language processing. *Brain and Language*, 121(3), 273–288.  
5        <http://doi.org/10.1016/j.bandl.2012.03.005>
- 6        Grill-Spector, K. (2003). The neural basis of object perception. *Current Opinion in*  
7        *Neurobiology*, 13(2), 159–166. [http://doi.org/10.1016/S0959-4388\(03\)00040-0](http://doi.org/10.1016/S0959-4388(03)00040-0)
- 8        Grill-Spector, K., Henson, R., & Martin, A. (2006). Repetition and the brain: Neural  
9        models of stimulus-specific effects. *Trends in Cognitive Sciences*, 10(1), 14–23.  
10        <http://doi.org/10.1016/j.tics.2005.11.006>
- 11        Grinband, J., Wager, T. D., Lindquist, M., Ferrera, V. P., & Hirsch, J. (2008).  
12        Detection of time-varying signals in event-related fMRI designs. *NeuroImage*,  
13        43(3), 509–520. <http://doi.org/10.1016/j.neuroimage.2008.07.065>
- 14        Harnad, S. (1990). The symbol grounding problem. *Physica D*, 42, 335–346.  
15        <http://doi.org/10.1080/0952813X.2014.940139>
- 16        Hasson, U., Andric, M., Atilgan, H., & Collignon, O. (2016). Congenital blindness is  
17        associated with large-scale reorganization of anatomical networks. *NeuroImage*,  
18        128, 362–372. <http://doi.org/10.1016/j.neuroimage.2015.12.048>
- 19        He, C., Peelen, M. V., Han, Z., Lin, N., Caramazza, A., & Bi, Y. (2013). Selectivity for  
20        large nonmanipulable objects in scene-selective visual cortex does not require  
21        visual experience. *NeuroImage*, 79, 1–9.  
22        <http://doi.org/10.1016/j.neuroimage.2013.04.051>
- 23        Hickok, G., & Poeppel, D. (2007). The cortical organization of speech processing.  
24        *Nature Reviews Neuroscience*, 8(May), 393–402. <http://doi.org/10.1038/nrn2113>
- 25        Horner, A. J., & Henson, R. N. (2011). Repetition suppression in occipitotemporal  
26        cortex despite negligible visual similarity: Evidence for postperceptual

## CONCEPTUAL KNOWLEDGE IN BLIND

- 1           processing? *Human Brain Mapping*, 32(10), 1519–1534.  
2           <http://doi.org/10.1002/hbm.21124>
- 3   Hsu, N. S., Kraemer, D. J. M., Oliver, R. T., Schlichting, M. L., & Thompson-Schill, S.  
4   L. (2011). Color, context, and cognitive style: Variations in color knowledge  
5   retrieval as a function of task and subject variables. *Journal of Cognitive*  
6   *Neuroscience*, 23(9), 2544–2557. <http://doi.org/10.1162/jocn.2011.21619>
- 7   Kanjlia, S., Lane, C., Feigenson, L., & Bedny, M. (2016). Absence of visual  
8   experience modifies the neural basis of numerical thinking. *Proceedings of the*  
9   *National Academy of Sciences*, 113(40), 201524982.  
10   <http://doi.org/10.1073/pnas.1524982113>
- 11   Koch, C., Massimini, M., Boly, M., & Tononi, G. (2016). Neural correlates of  
12   consciousness: progress and problems. *Nature Reviews Neuroscience*, 17(5),  
13   307–321. <http://doi.org/10.1038/nrn.2016.22>
- 14   Kosslyn, S. M., Ganis, G., & Thompson, W. L. (2001). Neural foundations of imagery.  
15   *Nature Reviews Neuroscience*, 2(9), 635–642. <http://doi.org/10.1038/35090055>
- 16   Kotz, S. A., Cappa, S. F., Cramon, D. Y. Von, & Friederici, A. D. (2002). Modulation  
17   of the Lexical – Semantic Network by Auditory Semantic Priming : An Event-  
18   Related Functional MRI Study. *NeuroImage*, 17, 1761–1772.  
19   <http://doi.org/10.1006/nimg.2002.1316>
- 20   Kriegeskorte, N., Mur, M., Ruff, D. A., Kiani, R., Bodurka, J., Esteky, H., ...  
21   Bandettini, P. A. (2008). Matching Categorical Object Representations in Inferior  
22   Temporal Cortex of Man and Monkey. *Neuron*, 60(6), 1126–1141.  
23   <http://doi.org/10.1016/j.neuron.2008.10.043>
- 24   Lakoff, G., & Johnson, M. (1999). *Philosophy in the flesh*. New York: Basic Books.
- 25   Liu, Y., Yu, C., Liang, M., Li, J., Tian, L., Zhou, Y., ... Jiang, T. (2007). Whole brain  
26   functional connectivity in the early blind. *Brain*, 130(8), 2085–2096.



## CONCEPTUAL KNOWLEDGE IN BLIND

- 1           <http://doi.org/10.1093/brain/awm121>
- 2   Mahon, B. Z., & Caramazza, A. (2008). A critical look at the embodied cognition  
3           hypothesis and a new proposal for grounding conceptual content. *Journal of*  
4           *Physiology Paris*, 102(1–3), 59–70.  
5           <http://doi.org/10.1016/j.jphysparis.2008.03.004>
- 6   Marmor, G. (1978). Age at onset of blindness and the development of the semantics  
7           of color names. *Journal of Experimental Child Psychology*, 278, 344–345.  
8           Retrieved from  
9           <http://www.sciencedirect.com/science/article/pii/0022096578900826>
- 10   Martin, A. (2015). GRAPES-Grounding representations in action, perception, and  
11           emotion systems: How object properties and categories are represented in the  
12           human brain. *Psychonomic Bulletin & Review*, 979–990.  
13           <http://doi.org/10.3758/s13423-015-0842-3>
- 14   Martin, A., Haxby, J., & Lalonde, F. (1995). Discrete Cortical Regions Associated with  
15           Knowledge of Color and Knowledge of Action. *Science*, 270(5233), 102–105.  
16           Retrieved from <http://www.sciencemag.org/content/270/5233/102.short>
- 17   Martin, C. B., Douglas, D., Newsome, R. N., Man, L. L. Y., & Barense, M. D. (2018).  
18           Integrative and distinctive coding of visual and conceptual object features in the  
19           ventral visual stream. *ELife*, 7, 1–29. <http://doi.org/10.7554/eLife.31873>
- 20   Mirman, D., Chen, Q., Zhang, Y., Wang, Z., Faseyitan, O. K., Coslett, H. B., &  
21           Schwartz, M. F. (2015). Neural organization of spoken language revealed by  
22           lesion-symptom mapping. *Nature Communications*, 6, 1–9.  
23           <http://doi.org/10.1038/ncomms7762>
- 24   Mitchell, T. M., Shinkareva, S. V., Carlson, A., Chang, K.-M., Malave, V. L., Mason,  
25           R. A., & Just, M. A. (2008). Predicting Human Brain Activity Associated with the  
26           Meanings of Nouns. *Science*, 320(5880), 1191–1195.

## CONCEPTUAL KNOWLEDGE IN BLIND

- 1        <http://doi.org/10.1126/science.1152876>
- 2        Mohr, H. M., Linder, N. S., Linden, D. E. J., Kaiser, J., & Sireteanu, R. (2009).  
3        Orientation-specific adaptation to mentally generated lines in human visual  
4        cortex. *NeuroImage*, 47(1), 384–391.  
5        <http://doi.org/10.1016/j.neuroimage.2009.03.045>
- 6        Naselaris, T., Prenger, R. J., Kay, K. N., Oliver, M., & Gallant, J. L. (2009). Bayesian  
7        Reconstruction of Natural Images from Human Brain Activity. *Neuron*, 63(6),  
8        902–915. <http://doi.org/10.1016/j.neuron.2009.09.006>
- 9        Noppeney, U., Friston, K. J., & Price, C. J. (2003). Effects of visual deprivation on the  
10       organization of the semantic system. *Brain: A Journal of Neurology*, 126(Pt 7),  
11       1620–1627. <http://doi.org/10.1093/brain/awg152>
- 12       Noppeney, U., & Price, C. J. (2001). Functional imaging of the semantic system:  
13       Retrieval of sensory-experienced and verbally learned knowledge. *Brain and*  
14       *Language*, 84, 120–133. [http://doi.org/10.1016/S0093-934X\(02\)00525-4](http://doi.org/10.1016/S0093-934X(02)00525-4)
- 15       Noppeney, U., & Price, C. J. (2002). Retrieval of visual, auditory, and abstract  
16       semantics. *NeuroImage*, 15, 917–926. <http://doi.org/10.1006/nimg.2001.1016>
- 17       O'Reilly, J. X., Woolrich, M. W., Behrens, T. E. J., Smith, S. M., & Johansen-berg, H.  
18       (2012). Tools of the trade: Psychophysiological interactions and functional  
19       connectivity. *Social Cognitive and Affective Neuroscience*, 7(5), 604–609.  
20       <http://doi.org/10.1093/scan/nss055>
- 21       Peelen, M. V., Bracci, S., Lu, X., Chenxi, H., Caramazza, A., & Bi, Y. (2013). Tool  
22       selectivity in left occipitotemporal cortex develops without vision. *Journal of*  
23       *Cognitive Neuroscience*, 25(8), 1225–1234. <http://doi.org/10.1162/jocn>
- 24       Peelen, M. V., & Downing, P. E. (2017). Category selectivity in human visual cortex:  
25       Beyond visual object recognition. *Neuropsychologia*, 105(April), 177–183.  
26       <http://doi.org/10.1016/j.neuropsychologia.2017.03.033>

## CONCEPTUAL KNOWLEDGE IN BLIND

- 1 Peelen, M. V, He, C., Han, Z., Caramazza, A., & Bi, Y. (2014). Nonvisual and visual  
2 object shape representations in occipitotemporal cortex: evidence from  
3 congenitally blind and sighted adults. *The Journal of Neuroscience : The Official*  
4 *Journal of the Society for Neuroscience*, *34*(1), 163–70.  
5 <http://doi.org/10.1523/JNEUROSCI.1114-13.2014>
- 6 Proklova, D., Kaiser, D., & Peelen, M. V. (2016). Disentangling Representations of  
7 Object Shape and Object Category in Human Visual Cortex: The Animate–  
8 Inanimate Distinction. *Journal of Cognitive Neuroscience*, *28*(5), 680–692.  
9 <http://doi.org/10.1162/jocn>
- 10 Pulvermüller, F., & Hauk, O. (2006). Category-specific conceptual processing of color  
11 and form in left fronto-temporal cortex. *Cerebral Cortex (New York, N.Y. : 1991)*,  
12 *16*(8), 1193–201. <http://doi.org/10.1093/cercor/bhj060>
- 13 Pylyshyn, Z. W. (1984). *Computation and cognition*. Cambridge: MIT Press.
- 14 R Core Team. (2013). R: A language and environment for statistical computing.
- 15 Saygin, A. P., McCullough, S., Alac, M., & Emmorey, K. (2010). Modulation of BOLD  
16 response in motion-sensitive lateral temporal cortex by real and fictive motion  
17 sentences. *Journal of Cognitive Neuroscience*, *22*(11), 2480–90.  
18 <http://doi.org/10.1162/jocn.2009.21388>
- 19 Simmons, W. K., Ramjee, V., Beauchamp, M. S., McRae, K., Martin, A., & Barsalou,  
20 L. W. (2007). A common neural substrate for perceiving and knowing about  
21 color. *Neuropsychologia*, *45*(12), 2802–2810.  
22 <http://doi.org/10.1016/j.neuropsychologia.2007.05.002>
- 23 Sladky, R., Friston, K. J., Tröstl, J., Cunnington, R., Moser, E., & Windischberger, C.  
24 (2011). Slice-timing effects and their correction in functional MRI. *NeuroImage*,  
25 *58*(2), 588–594. <http://doi.org/10.1016/j.neuroimage.2011.06.078>
- 26 Striem-Amit, E., Wang, X., Bi, Y., & Caramazza, A. (2018). How do blind people

## CONCEPTUAL KNOWLEDGE IN BLIND

- 1 represent rainbows? Disentangling components of conceptual representations.  
2 *BioRxiv*, 287318. <http://doi.org/10.1101/287318>
- 3 Swisher, J. D., Halko, M. A., Merabet, L. B., McMains, S. A., & Somers, D. C. (2007).  
4 Visual Topography of Human Intraparietal Sulcus. *Journal of Neuroscience*,  
5 27(20), 5326–5337. <http://doi.org/10.1523/JNEUROSCI.0991-07.2007>
- 6 Van Ackeren, M. J., Barbero, F., Mattioni, S., Bottini, R., & Collignon, O. (2018).  
7 Neuronal populations in the occipital cortex of the blind synchronize to the  
8 temporal dynamics of speech. *ELife*, 1–45. <http://doi.org/10.7554/eLife.31640>
- 9 van den Hurk, J., Van Baelen, M., & Op de Beeck, H. P. (2017). Development of  
10 visual category selectivity in ventral visual cortex does not require visual  
11 experience. *Proceedings of the National Academy of Sciences*, 201612862.  
12 <http://doi.org/10.1073/pnas.1612862114>
- 13 Wang, X., Peelen, M. V., Han, Z., He, C., Caramazza, A., & Bi, Y. (2015). How Visual  
14 Is the Visual Cortex? Comparing Connectional and Functional Fingerprints  
15 between Congenitally Blind and Sighted Individuals. *Journal of Neuroscience*,  
16 35(36), 12545–12559. <http://doi.org/10.1523/JNEUROSCI.3914-14.2015>
- 17 Wheatley, T., Weisberg, J., Beauchamp, M. S., & Martin, A. (2005). Automatic  
18 priming of semantically related words reduces activity in the fusiform gyrus.  
19 *Journal of Cognitive Neuroscience*, 17(12), 1871–85.  
20 <http://doi.org/10.1162/089892905775008689>
- 21 Wible, C. G., Han, S. D., Spencer, M. H., Kubicki, M., Niznikiewicz, M. H., Jolesz, F.  
22 A., ... Nestor, P. (2006). Connectivity among semantic associates: An fMRI  
23 study of semantic priming. *Brain and Language*, 97(3), 294–305.  
24 <http://doi.org/10.1016/j.bandl.2005.11.006>
- 25 Xu, Y. (2007). The Role of the Superior Intraparietal Sulcus in Supporting Visual  
26 Short-Term Memory for Multifeature Objects. *Journal of Neuroscience*, 27(43),

## CONCEPTUAL KNOWLEDGE IN BLIND

1           11676–11686. <http://doi.org/10.1523/JNEUROSCI.3545-07.2007>

2       Zeki, S., & Stutters, J. (2013). Functional specialization and generalization for

3       grouping of stimuli based on colour and motion. *NeuroImage*, *73*, 156–166.

4       <http://doi.org/10.1016/j.neuroimage.2013.02.001>

5

6

7

8

9

10
